# Supplementary material
Source: PubMed Central journal article supplement (PMC2535935)
Supplement: NIHMS63716-supplement-1si20061227_02.pdf [file NIHMS63716-supplement-1si20061227_02.pdf]

# Multiple alignment of membrane proteins for measuring residual dipolar couplings using lanthanide ions bound to a small metal chelator

Douglas E. Kamen, Sean M. Cahill, and Mark E. Girvin

*Biochemistry Department, Albert Einstein College of Medicine, 1300 Morris Park Ave, Bronx NY, 10461*

## Supporting Information

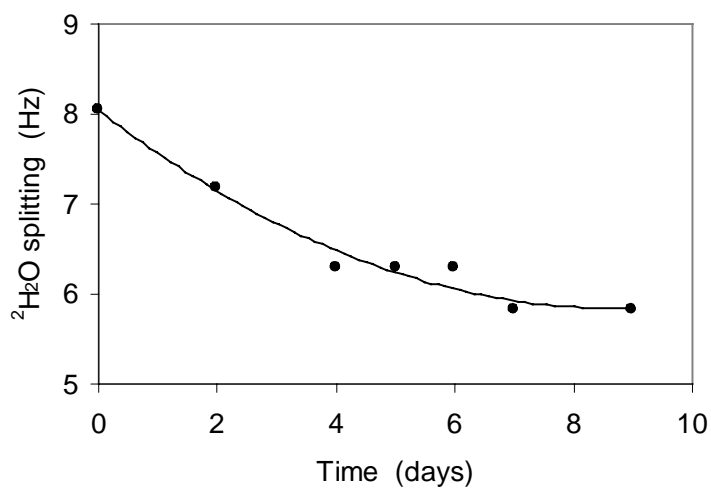

Figure S1. Decrease in deuterium splitting over time. Measurements were made at 47 °C on a Bruker DRX 600. Sample conditions were 6% polyacrylamide, 50 mM potassium phosphate, 5% LPPG, 1 mM subunit c, pH 6.8. The curve is a simple trendline.

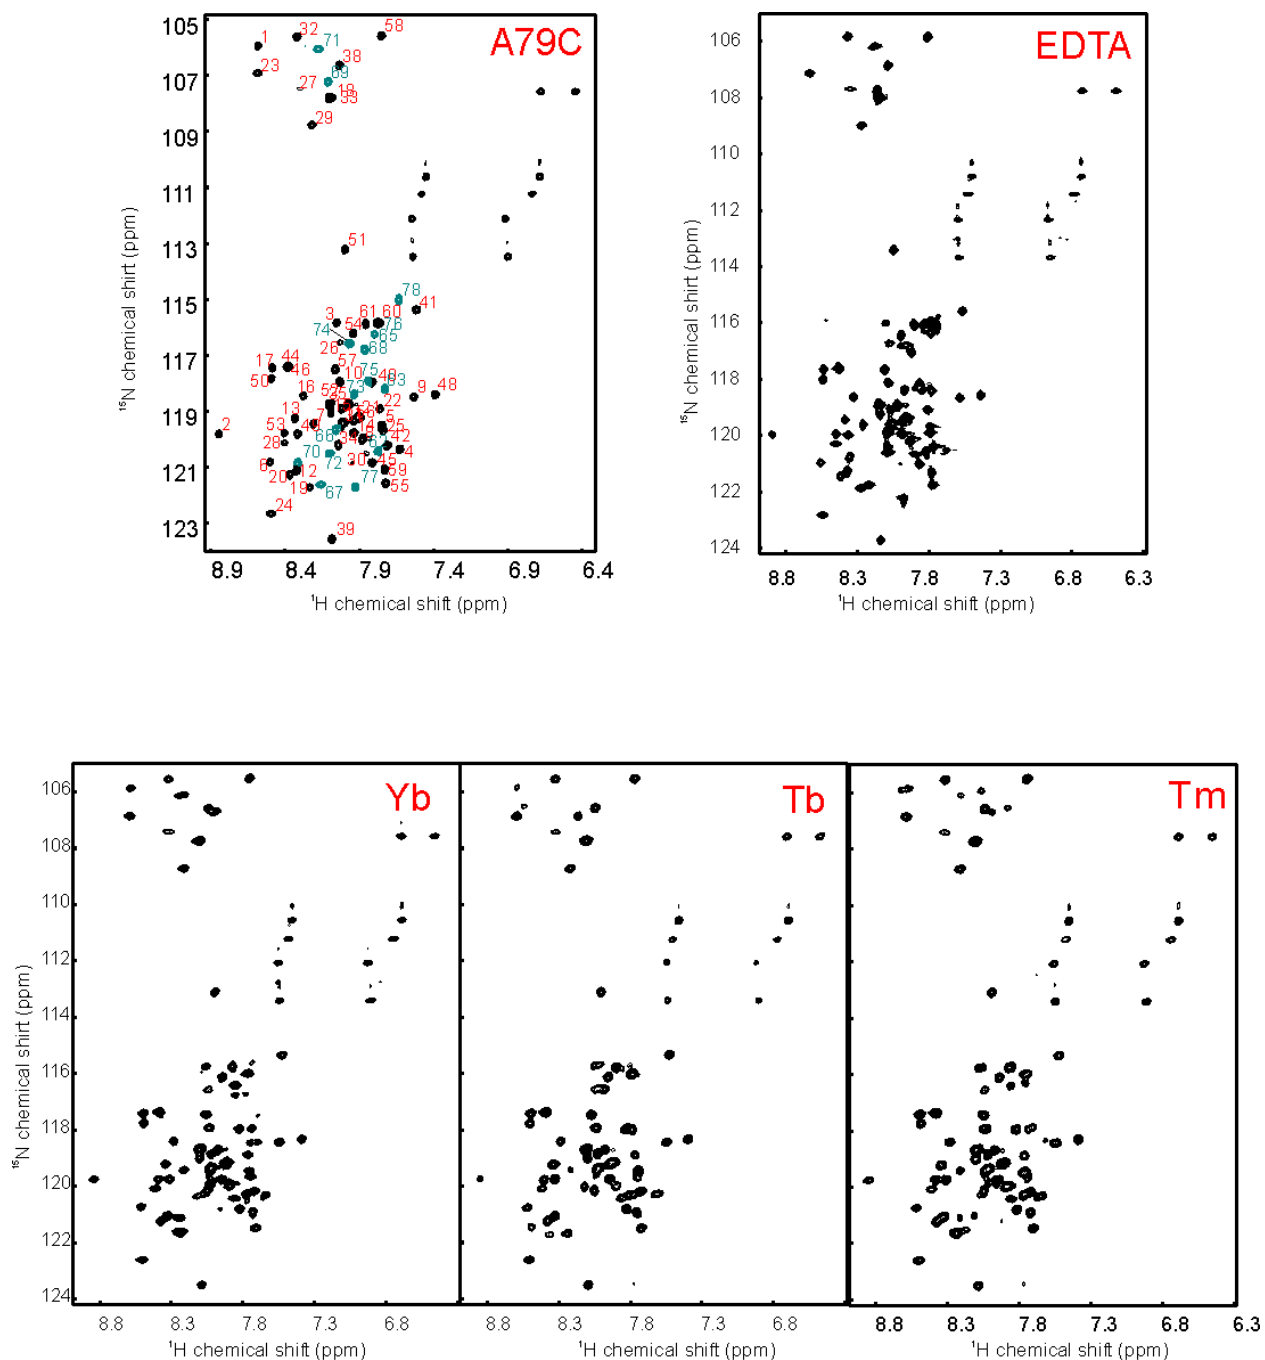

Figure S2. HSQC spectra of A79C mutant subunit c. Clockwise from top left are unmodified A79C, A79C with EDTA modification and no bound metal, and modified with  $Tm^{3+}$ ,  $Tb^{3+}$ , or  $Yb^{3+}$ . Assignments are shown in the first panel, with red labels indicating resonances that do not shift on addition of lanthanide, and green identifying those that do.

Table S1. Measured  $^1\text{H}^{15}\text{N}$  and  $^{13}\text{C}^{13}\text{C}^\alpha$  RDC values for A79C with bound lanthanide ions.

| Residue | $\text{Tm}^{3+}$ at 800 MHz |                                  | $\text{Yb}^{3+}$ at 800 MHz |                                  | $\text{Tb}^{3+}$ at 900 MHz |                                  |
|---------|-----------------------------|----------------------------------|-----------------------------|----------------------------------|-----------------------------|----------------------------------|
|         | HN                          | $\text{C}^\alpha\text{C}^\alpha$ | HN                          | $\text{C}^\alpha\text{C}^\alpha$ | HN                          | $\text{C}^\alpha\text{C}^\alpha$ |
| 1       |                             | -0.2                             |                             | -3.9                             |                             | 1.6                              |
| 2       | 3.4                         | 1.3                              | 0.3                         | 0.1                              | 2.0                         | -0.1                             |
| 3       | -2.3                        | 1.7                              | 2.2                         | 0.9                              | -4.1                        | 1.1                              |
| 4       | -1.1                        | -3.8                             | -1.3                        | 0.2                              | 0.4                         | 1.8                              |
| 5       | -0.1                        | 2.6                              | 2.0                         | 0.4                              | 2.4                         | 0.9                              |
| 6       | -1.0                        | -0.6                             | 2.0                         | -0.4                             | 0.1                         | -3.4                             |
| 7       | 0.6                         | -7.3                             | -0.6                        | 0.0                              | 0.7                         | 1.1                              |
| 8       | -4.6                        | -1.8                             | -0.1                        | 0.1                              | -5.0                        | 0.8                              |
| 9       | -0.7                        | -0.5                             | -1.1                        | 1.9                              | 2.9                         | 2.2                              |
| 10      | 2.8                         | 8.9                              | -3.4                        | 4.4                              | 5.9                         | 3.0                              |
| 11      | -8.3                        | 0.8                              | n.d.                        | 2.1                              | n.d.                        | 2.8                              |
| 12      | -6.4                        | 0.9                              | -1.5                        | -0.1                             | -1.4                        | -4.3                             |
| 13      | -0.6                        | -1.1                             | -1.6                        | 1.0                              | -3.1                        | 2.3                              |
| 14      | -5.7                        | n.d.                             | 2.3                         | n.d.                             | -0.8                        | n.d.                             |
| 15      | 6.1                         | -5.2                             | -2.4                        | -0.4                             | -0.2                        | 1.8                              |
| 16      | 2.7                         | 3.9                              | 2.8                         | -0.8                             | -0.8                        | 3.6                              |
| 17      | -1.5                        | 3.1                              | -0.4                        | 0.5                              | 3.3                         | 8.6                              |
| 18      | 3.7                         | -2.9                             | 4.3                         | -5.7                             | -2.0                        | -6.0                             |
| 19      | 0.7                         | 1.7                              | 4.7                         | 0.0                              | 0.1                         | 1.2                              |
| 20      | -1.8                        | 3.4                              | -1.2                        | 3.1                              | 1.9                         | -4.1                             |
| 21      | -1.2                        | n.d.                             | 5.1                         | n.d.                             | 2.8                         | -0.6                             |
| 22      | -5.2                        | 0.7                              | 2.4                         | 0.3                              | -6.8                        | 5.8                              |
| 23      | 3.9                         | -1.9                             | 0.5                         | -0.5                             | 2.7                         | -1.7                             |
| 24      | -2.3                        | n.d.                             | 2.6                         | n.d.                             | -1.5                        | n.d.                             |
| 25      | 5.7                         | n.d.                             | -0.3                        | n.d.                             | 1.8                         | n.d.                             |
| 26      | -10.6                       | n.d.                             | -3.8                        | -2.2                             | -8.1                        | n.d.                             |
| 27      | 5.0                         | -6.3                             | n.d.                        | -1.7                             | 0.0                         | -8.2                             |
| 28      | -2.0                        | -0.9                             | 2.3                         | -0.5                             | 3.5                         | -4.3                             |
| 29      | -0.1                        | -1.8                             | 5.2                         | 3.3                              | 0.1                         | 5.2                              |
| 30      | -1.5                        | -2.0                             | -1.2                        | 3.7                              | -2.7                        | -5.6                             |
| 31      | -1.9                        | -2.0                             | 2.2                         | 0.2                              | 1.6                         | -3.9                             |
| 32      | 1.3                         | 0.9                              | 2.4                         | -0.5                             | 1.9                         | -2.3                             |
| 33      | 2.6                         | 1.0                              | 1.8                         | -0.2                             | 3.5                         | 1.3                              |
| 34      | -2.4                        | -0.1                             | 0.9                         | -0.4                             | -4.0                        | 1.5                              |
| 35      | -0.1                        | 1.9                              | -5.1                        | 1.0                              | -1.0                        | 0.1                              |
| 36      | 1.3                         | 2.3                              | 0.8                         | 0.4                              | -1.8                        | 0.7                              |
| 37      | 0.9                         | 0.9                              | -0.4                        | 0.4                              | 0.5                         | -0.5                             |
| 38      | 1.4                         | -0.7                             | 5.3                         | -0.3                             | 3.5                         | -4.5                             |
| 39      | -4.1                        | -0.4                             | -2.4                        | -0.1                             | -2.2                        | 0.0                              |
| 40      | 1.2                         | -1.3                             | -0.3                        | 0.3                              | 1.3                         | -1.8                             |
| 41      | -0.6                        | 1.6                              | 0.5                         | 0.3                              | -2.8                        | -1.2                             |
| 42      | 1.8                         | n.d.p.                           | 2.8                         | n.d.p.                           | -2.4                        | n.d.p.                           |
| 43      | n.d.p.                      | -0.9                             | n.d.p.                      | 0.1                              | n.d.p.                      | 1.5                              |
| 44      | -0.8                        | -0.7                             | -1.1                        | 0.4                              | 3.0                         | -0.5                             |
| 45      | 0.1                         | 4.0                              | -2.0                        | 1.7                              | 0.0                         | 3.3                              |
| 46      | -0.8                        | n.d.p.                           | 3.3                         | n.d.p.                           | -3.2                        | n.d.p.                           |
| 47      | n.d.p.                      | 2.6                              | n.d.p.                      | 0.3                              | n.d.p.                      | -0.9                             |
| 48      | 0.7                         | -1.8                             | 2.4                         | 0.7                              | -1.3                        | -4.2                             |
| 49      | -1.8                        | -2.5                             | -1.0                        | -1.8                             | 1.8                         | -1.8                             |

|    |        |        |        |        |        |        |
|----|--------|--------|--------|--------|--------|--------|
| 50 | 1.7    | 0.6    | 2.4    | 0.5    | 5.1    | 0.3    |
| 51 | 0.1    | -7.4   | 3.0    | 0.3    | -0.6   | -1.0   |
| 52 | -2.5   | -1.4   | 0.0    | -1.3   | 2.7    | -1.8   |
| 53 | -2.5   | 3.5    | 2.8    | 2.4    | -1.0   | -5.2   |
| 54 | -0.3   | -2.2   | -2.4   | 0.8    | 1.3    | 1.4    |
| 55 | -5.3   | 2.2    | -3.3   | 3.0    | -1.6   | -0.3   |
| 56 | 3.1    | 0.6    | 0.1    | -0.3   | 1.2    | -1.8   |
| 57 | -2.4   | 0.7    | -0.8   | -0.4   | -2.7   | 1.1    |
| 58 | 2.8    | -0.9   | -1.6   | -0.2   | 1.5    | -4.0   |
| 59 | -2.9   | -2.4   | -6.6   | -1.2   | -0.8   | -1.5   |
| 60 | -4.1   | 0.6    | -3.5   | 1.1    | -2.1   | 3.5    |
| 61 | -2.5   | 0.6    | -2.1   | 0.4    | -1.6   | -8.9   |
| 62 | 4.4    | -5.6   | -1.9   | n.d.   | 1.8    | 3.6    |
| 63 | 1.9    | n.d.p. | n.d.   | n.d.p. | -5.7   | n.d.p. |
| 64 | n.d.p. | n.d.   | n.d.p. | n.d.   | n.d.p. | n.d.   |
| 65 | n.d.   | n.d.   | n.d.   | n.d.   | n.d.   | n.d.   |
| 66 | n.a.   | n.a.   | 1.4    | n.a.   | n.a.   | 2.8    |
| 67 | 1.4    | n.a.   | n.a.   | n.a.   | 0.5    | 4.8    |
| 68 | -2.1   | n.a.   | -1.7   | n.a.   | -1.2   | -1.9   |
| 69 | n.a.   | n.a.   | n.a.   | n.a.   | 2.0    | n.a.   |
| 70 | n.a.   | n.a.   | n.a.   | n.a.   | n.a.   | n.a.   |
| 71 | n.a.   | n.a.   | n.a.   | n.a.   | n.a.   | n.a.   |
| 72 | n.a.   | n.a.   | n.a.   | n.a.   | n.a.   | n.a.   |
| 73 | n.a.   | n.a.   | n.a.   | n.a.   | n.a.   | n.a.   |
| 74 | n.a.   | n.a.   | n.a.   | n.a.   | n.a.   | n.a.   |
| 75 | n.a.   | n.a.   | n.a.   | n.a.   | n.a.   | n.a.   |
| 76 | n.a.   | n.a.   | n.a.   | n.a.   | n.a.   | n.a.   |
| 77 | n.a.   | n.a.   | n.a.   | n.a.   | n.a.   | n.a.   |
| 78 | n.a.   | n.a.   | n.a.   | n.a.   | n.a.   | n.a.   |
| 79 | n.a.   | n.a.   | n.a.   | n.a.   | n.a.   | n.a.   |

n.a. – Not assigned due to large pseudocontact shift.  
n.d. – Not determined due to low signal to noise ratio.  
n.d.p. – Not assigned due to proline.

## Methods

*Preparation of A79C.* The mutation was generated using the Quickchange Site Directed Mutagenesis Kit (Stratagene). Purification and sample preparation was carried out as described<sup>1-3</sup>, with some modifications. Protein samples in 1:1 CHCl<sub>3</sub>:CH<sub>3</sub>OH with 15 mg of LPPG were dried under a stream of argon. It was necessary to add DTT to 3-5 mM in order to prevent intermolecular disulfide bond formation.

- (1) Girvin, M. E.; Fillingame, R. H. *Biochemistry* **1995**, *34*, 1635-1645.
- (2) Girvin, M. E.; Rastogi, V. K.; Abildgaard, F.; Markley, J. L.; Fillingame, R. H. *Biochemistry* **1998**, *37*, 8817-8824.
- (3) Krueger-Koplin, R. D.; Sorgen, P. L.; Krueger-Koplin, S. T.; Rivera-Torres, I. O.; Cahill, S. M.; Hicks, D. B.; Grinius, L.; Krulwich, T. A.; Girvin, M. E. *J Biomol NMR* **2004**, *28*, 43-57.
